# Supplementary material for: Combining Living Microorganisms with Regenerated Silk Provides Nanofibril Based Thin Films with heat Responsive Wrinkled States for Smart Food Packaging
Source: Preprints.org preprint supplement (doi:10.20944/preprints201806.0320.v1), 2018-06-20
Supplement: Supplementary file 1 [file supplementary]

## Supplementary Materials

# Combining living microorganisms with regenerated silk provides nanofibril based thin films with heat responsive wrinkled states for smart food packaging

Luca Valentini<sup>1,\*</sup>, Silvia Bittolo Bon<sup>1</sup> and Nicola Pugno<sup>2,3,4\*</sup>

<sup>1</sup> Dipartimento di Ingegneria Civile e Ambientale, Università di Perugia, UdR INSTM, Strada di Pentima 4, 05100 Terni - Italy. E-mail: luca.valentini@unipg.it

<sup>2</sup> Laboratory of Bio-Inspired and Graphene Nanomechanics, Department of Civil, Environmental and Mechanical Engineering, University of Trento, Trento, Italy. E-mail: nicola.pugno@unitn.it

<sup>3</sup> School of Engineering and Materials Science, Queen Mary University of London, Mile End Road, London, United Kingdom

<sup>4</sup> Ket-Lab, Edoardo Amaldi Foundation, Italian Space Agency, via del Politecnico snc, I-00133 Roma, Italy

\* Correspondence: luca.valentini@unipg.it; Tel.: +39-0744-492924; nicola.pugno@unitn.it; Tel.: +39-0461-282525

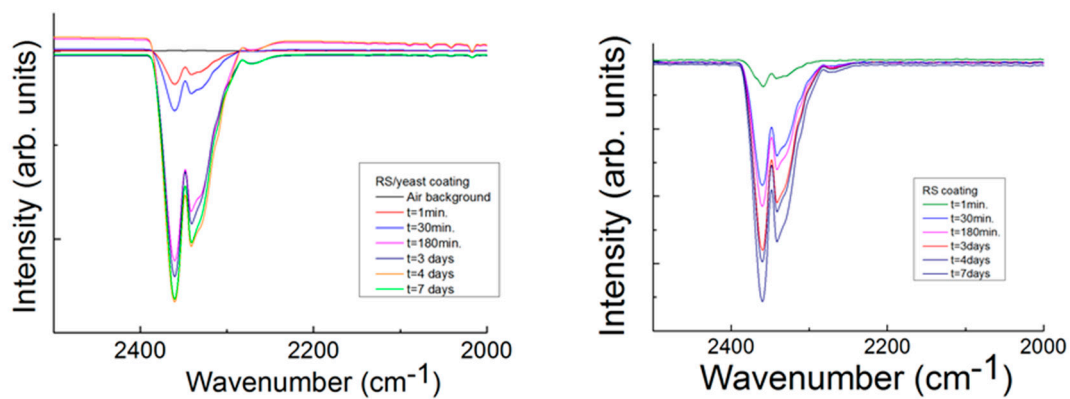

Figure S1. Evolution of the CO<sub>2</sub> absorption peak over period of 7 days for (left) RS/yeast and (right) RS coatings, respectively.

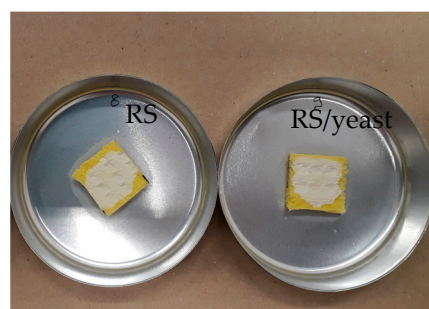

Figure S2. Water soaked sponges with different types of coatings. On the left it is evident the drying region around the sponge due to the water loss.
